# Supplementary material for: IQGAP1 in Podosomes/Invadosomes Is Involved in the Progression of Glioblastoma Multiforme Depending on the Tumor Status
Source: Preprints.org preprint supplement (doi:10.20944/preprints201611.0126.v3), 2017-01-16
Supplement: Supplementary file 1 [file supplementary]

# Supplementary Materials: IQGAP1 in Podosomes/Invadosomes Is Involved in the Progression of Glioblastoma Multiforme Depending on the Tumor Status

Deborah Rotoli, Natalia Dolores Pérez-Rodríguez, Manuel Morales, María del Carmen Maeso, Julio Ávila, Ali Mobasher and Pablo Martín-Vasallo

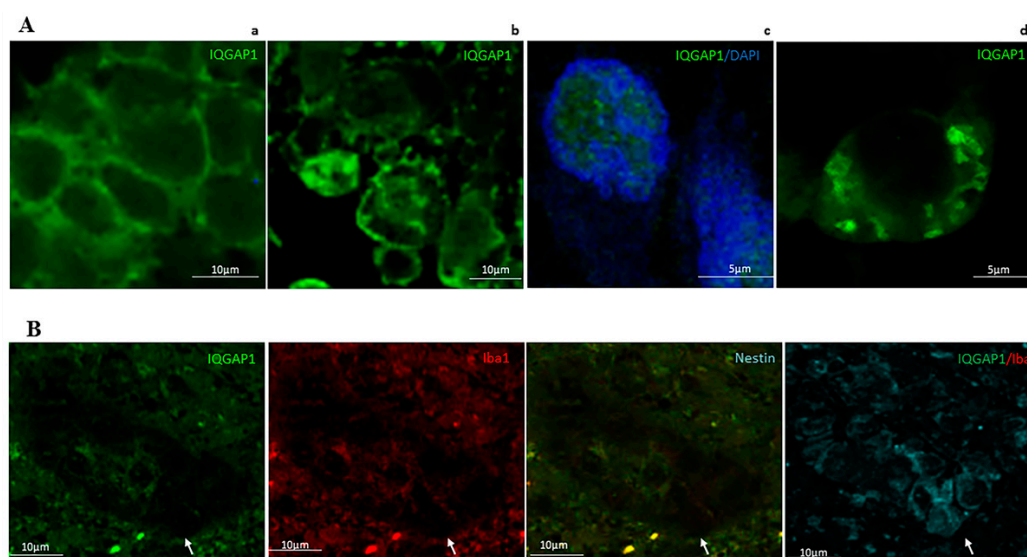

**Figure S1.** (A) Higher magnification of Figure 1A–D. IQGAP1 protein in GBM detected in: (a) plasma membrane; (b) cell protrusions, plasma membrane and cytosol; (c) nucleus; and (d) cell with podosome-like structures highly positive for IQGAP1; (B) Higher magnification of Figure 2K–O. Triple immunolocalization of IQGAP1 protein (green), Iba1 (red) and nestin (cyan). Arrow points to a nestin<sup>+</sup>/IQGAP1<sup>-</sup>/Iba1<sup>-</sup> cell flanked by nestin<sup>+</sup>/IQGAP1<sup>+</sup>/Iba1<sup>+</sup> cells.

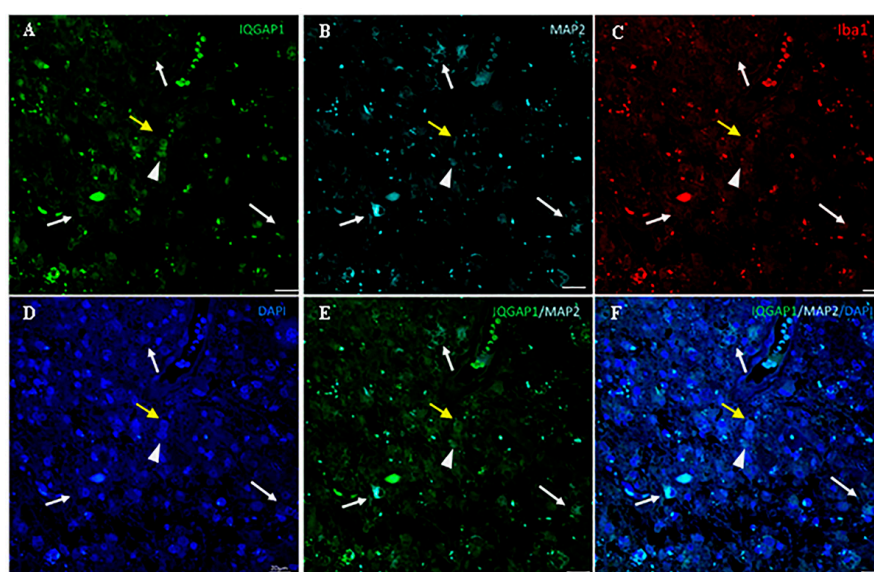

**Figure S2.** Triple immunolocalization of IQGAP1 protein (green), the microglia/macrophage marker Iba1 (red) and the Microtubule-associated protein 2 (MAP2, cyan) in GBM tissue sections. (A) IQGAP1; (B) MAP2; (C) Iba1; (D) DAPI; (E) IQGAP1/MAP2 merge; (F) IQGAP1/MAP2/DAPI merge. White arrows point to Map2<sup>+</sup> neurons IQGAP1<sup>-</sup>/Iba1<sup>-</sup>. Yellow arrows points to a cell IQGAP1<sup>+</sup>/Iba1<sup>+</sup>. Arrowhead points a cell IQGAP1<sup>+</sup>/nestin<sup>+</sup>. Bar 20 μm.

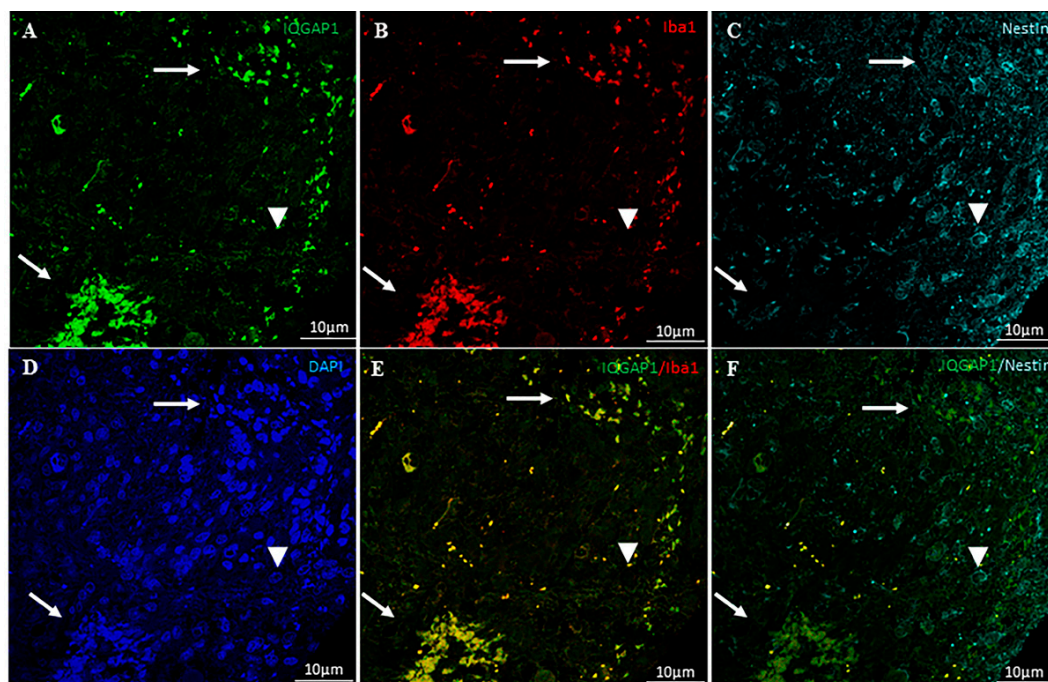

**Figure S3.** Triple immunolocalization of IQGAP1 protein (green), the microglia/macrophage marker Iba1 (red) and the CSC marker nestin (cyan). (A) IQGAP1; (B) Iba1; (C) Nestin; (D) DAPI; (E) IQGAP1/Iba1 merge; (F) IQGAP1/Nestin merge. In this highly vascularized area of a GBM tissue section, many nestin+ cells are observed (arrowhead). Note the massive presence of macrophages (Iba1+/IQGAP1+/nestin-) in the periphery (arrows). Scale bar: 10  $\mu$ m.

**Table S1.** IQGAP1/PCNA, IQGAP1/GFAP and IQGAP1/Iba1 colocalization. Mean and standard deviation of values obtained with the ImageJ plug-in “Mander’s coefficients”.

|                            | <i>n</i> | <i>R</i>         | Ch1/Ch2          | M1               | M2               | Ch1 Thresh,<br>Ch2 Thresh |
|----------------------------|----------|------------------|------------------|------------------|------------------|---------------------------|
| Ch1 = GFAP<br>Ch2 = IQGAP1 | 27       | $0.59 \pm 0.05$  | $0.995 \pm 0.02$ | $0.969 \pm 0.02$ | $0.971 \pm 0.01$ | 1;255                     |
| Ch1 = PCNA<br>Ch2 = IQGAP1 | 20       | $0.677 \pm 0.13$ | $0.750 \pm 0.29$ | $0.851 \pm 0.14$ | $0.739 \pm 0.20$ | 1;255                     |
| Ch1 = Iba1<br>Ch2 = IQGAP1 | 14       | $0.84 \pm 0.04$  | $0.801 \pm 0.15$ | $0.954 \pm 0.04$ | $0.835 \pm 0.09$ | 1;255                     |

*n* = samples analyzed. *R* = Mander’s Overlap coefficient. Value Range: 0–1, with 0 = low colocalization and 1 = high colocalization; Ch1/Ch2 = red/green pixel ratio. Ratio  $\approx 1$  allows the use of Mander’s Overlap coefficient (*R*); M1, M2 = Mander’s Colocalization coefficients for channel 1 (M1) and channel 2 (M2). Value range: 0–1, with 0 = no colocalization 1 = all pixels colocalize; Ch1 thresh, Ch2 thresh = ch1 and ch2 threshold.
